# Supplementary material
Source: PubMed Central journal article supplement (PMC5791062)
Supplement: ASN.2016121362SupplementaryData1.pdf [file ASN.2016121362SupplementaryData1.pdf]

## Supplemental data

### Redirecting TGF- $\beta$ signaling via $\beta$ -catenin/Foxo prevents kidney fibrosis

Xi Qiao,<sup>1,2</sup> Padmashree Rao,<sup>1</sup> Yun Zhang,<sup>1,3</sup> Lixin Liu,<sup>1,3</sup> Min Pang,<sup>1,4</sup> Hailong Wang<sup>1,5</sup>, Min Hu,<sup>1</sup> Xinrui Tian,<sup>1,6</sup> Jianlin Zhang,<sup>1,5</sup> Ye Zhao,<sup>1</sup> Xin Maggie Wang,<sup>7</sup> Chengshi Wang,<sup>1</sup> Hong Yu,<sup>8</sup> Fei Guo,<sup>1</sup> Qi Cao,<sup>1</sup> Yiping Wang,<sup>1</sup> Yuan Min Wang,<sup>9</sup> Geoff Yu Zhang,<sup>9</sup> Vincent W Lee,<sup>1</sup> Stephen I Alexander,<sup>9</sup> Guoping Zheng<sup>1</sup>, David CH Harris<sup>1</sup>

Supplemental Figures

MFI: 637/1037/821

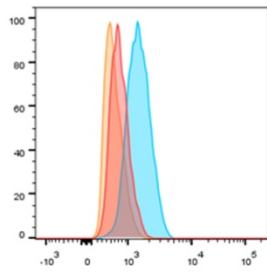

- No treatment control
- Treated with rhTGF- $\beta$ 1 alone
- Treated with rhTGF- $\beta$ 1 and Foxoi

Foxp3 →

**Supplemental Figure 1.** Representative histogram analyses of Foxp3 in iTregs arising from EL4 cells treated with rhTGF- $\beta$ 1 with and without Foxo inhibitor (Foxoi) AS1842856 (25 nM). MFI: mean fluorescence intensity.

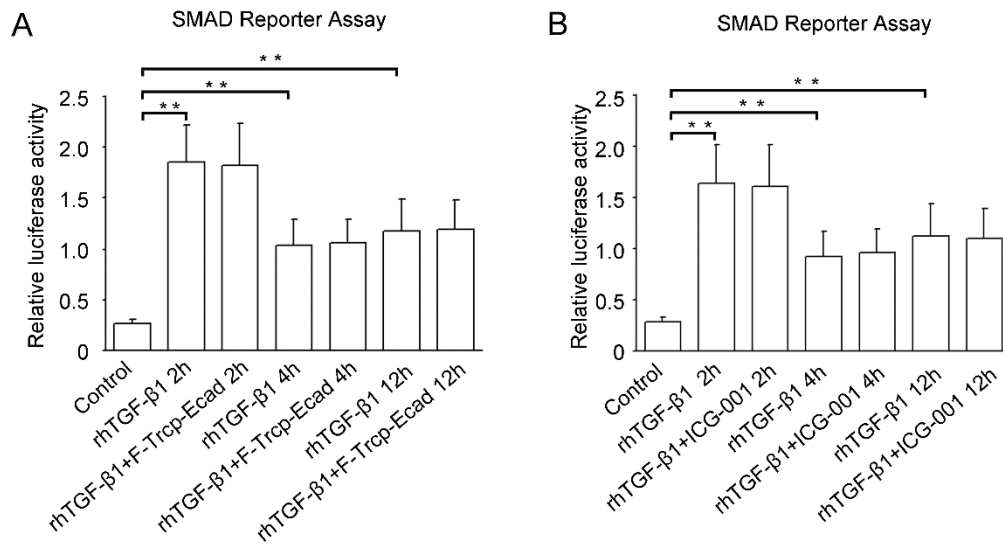

**Supplemental Figure 2. SMAD reporter activity in rhTGF-β1-treated EL4 cells is not changed by β-catenin.** (A) The SMAD reporter (relative luciferase activity) assay in control EL4 cells, and EL4 cells treated with rhTGF-β1 or rhTGF-β1 with F-TrCP-Ecad-transfection. (B) The SMAD reporter assay in EL4 cells in control EL4 cells, and EL4 cells treated with rhTGF-β or rhTGF-β1 and ICG-001. Bars represent mean ± SEM of triplicate determinations. Statistical significance was determined by one way ANOVA, followed by Tukey's post-hoc test. \*\*  $P < 0.01$ .

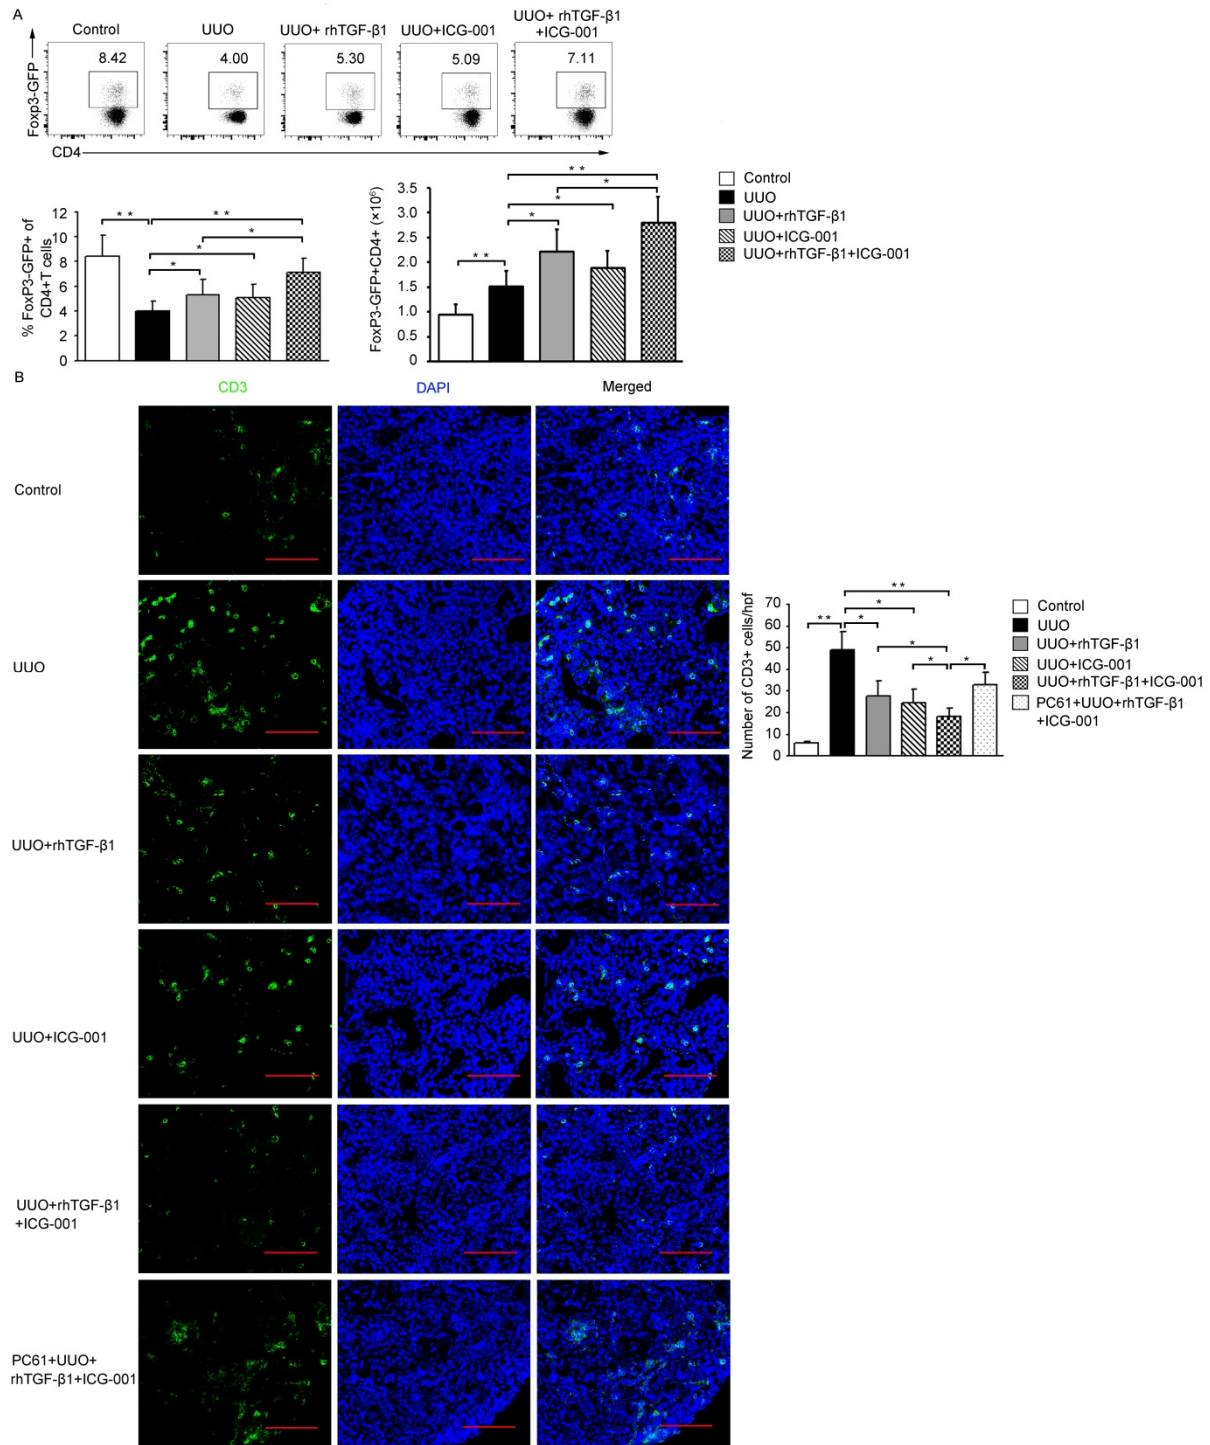

**Supplemental Figure 43. Shift of  $\beta$ -catenin from TCF to Foxo reduces kidney CD3<sup>+</sup> T cell infiltration in UUO mice by TGF- $\beta$ -induced Tregs. (A)** Representative flow cytometry plots (gating on CD3<sup>+</sup> CD4<sup>+</sup> cells) and bar graph showing the percentage and the absolute number of Tregs in the spleen at day 3 after UUO (one of five experiments is shown). A pool of splenocytes from 1 spleen was analyzed in each group. **(B)** Representative immunofluorescence staining and quantitation of CD3<sup>+</sup> T cell infiltration in kidneys. Original magnification,  $\times 40$  (n=6/group). Statistical significance was determined by one way

ANOVA, followed by Tukey's post-hoc test. All data are expressed as the mean  $\pm$  SEM. \*  $P < 0.05$ , \*\* $P < 0.01$ . Scale bars: 100  $\mu$ m.

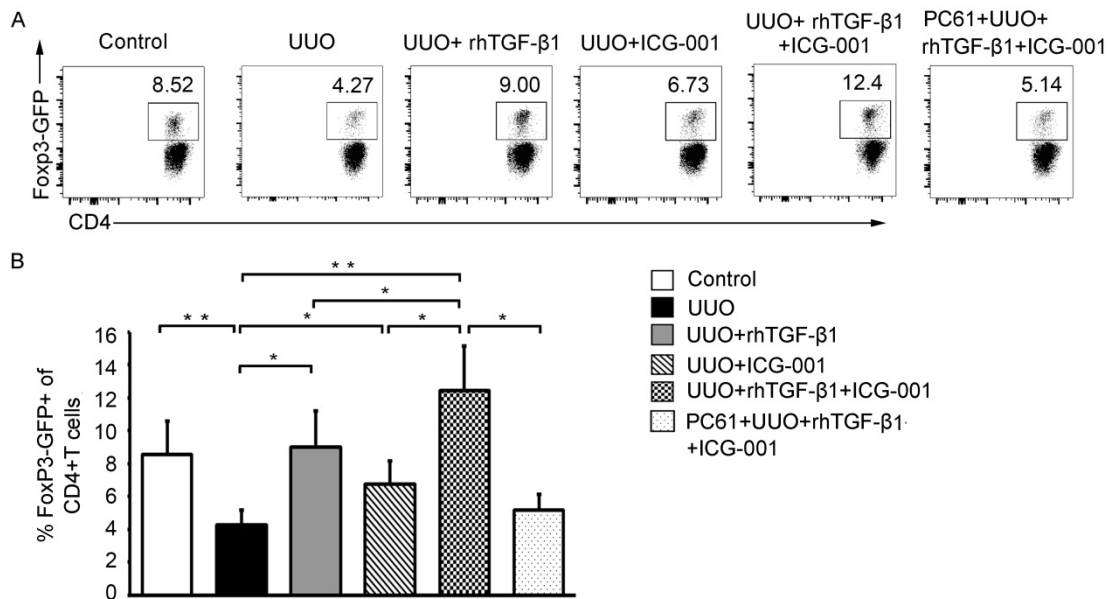

**Supplemental Figure 54. Shift of  $\beta$ -catenin from TCF to Foxo increases Tregs in spleen of UOU mice.** Representative flow cytometry plots (gating on CD3<sup>+</sup> CD4<sup>+</sup> cells) (A) and bar graphs (B) showing the percentage of Tregs in spleen at day 7 after UOU (one of five experiments is shown). A pool of splenocytes from 1 spleen was analyzed in each group. Statistical significance was determined by one way ANOVA, followed by Tukey's post-hoc test. All data are expressed as the mean  $\pm$  SEM. \*  $P < 0.05$ , \*\* $P < 0.01$ .

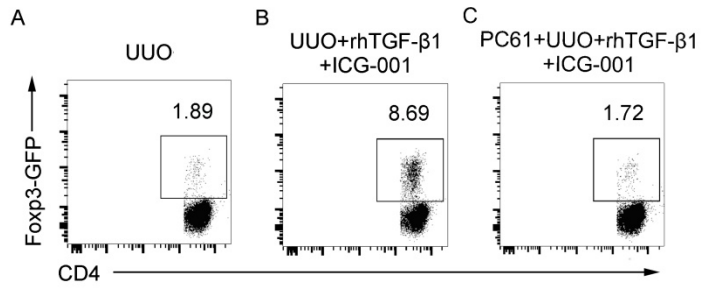

**Supplemental Figure 35.** Representative flow cytometry plots (gating on CD3<sup>+</sup> CD4<sup>+</sup> cells) of CD4<sup>+</sup>Fop3-GFP<sup>+</sup> Tregs in the spleen of untreated (A), control isotype IgG-injected (B) and PC61 injected (C) UUO mice treated with or without rhTGF-β1 and ICG-001.
