# Supplementary material
Source: PubMed Central journal article supplement (PMC5791062)
Supplement: ASN.2016121362SupplementaryData2.pdf [file ASN.2016121362SupplementaryData2.pdf]

## SIGNIFICANCE STATEMENT

The conflicting roles of TGF- $\beta$  create a dilemma in the treatment of human fibrotic diseases; targeting TGF- $\beta$ , the principal profibrotic factor, to prevent fibrosis will also abolish its protective anti-inflammatory effects. Similarly, the use of TGF- $\beta$  to reduce inflammation is prevented by its strong profibrotic effect. This study reveals for the first time that redirecting TGF- $\beta$  signaling *via*  $\beta$ -catenin/Foxo dissociates the profibrotic from anti-inflammatory effects of TGF- $\beta$ . Targeting  $\beta$ -catenin/Foxo provides a novel therapeutic strategy, allowing the use of TGF- $\beta$  to reduce both inflammation and fibrosis.
